# Supplementary material
Source: MDPI journal article supplement (https://www.mdpi.com/2073-4395/10/2/159)
Supplement: s1 [file s1]

## Supplementary material

### Protocol for DNA extraction of *Fusarium oxysporum*

For morphological and biological identification, infected root tissues of tomato were rinsed thrice with water and disinfected with 5% sodium hypochlorite solution (NaOCl) and washed with sterilized water, prior to cut aseptically into 2 cm pieces. Four pieces of samples placed into PDA medium plates and incubated for 7 days at 28 °C. After 7 days of incubation the isolate was investigated macroscopically (white to pinkish cottony growth of mycelium) and microscopically (sickle shape conidia with 3-4 septation) under microscope (Nikon Eclipse 80i equipped with NTS-Element F 3.0) following the key of identification of *Fusarium* spp [1].

For DNA extraction *Fo* mycelial was cultured on potato dextrose broth (PDB) ref and incubated for 48 hrs at 28 °C under shaking condition (200rpm). Mycelia was harvested and washed with sterilized water and ethylenediamine tetra acetic acid (EDTA). The DNA was extracted by cetyl trimethylammonium bromide (CTAB) method briefly; Frozen mycelia was grounded in sterilized pestle and mortar with 120 µl of CTAB. After fine grinding, powdered mycelia and 200 µl of CTAB added in 1.5mL eppendorf tubes were incubated at 65 °C for one hour. Tubes were centrifuged for 10 mins at 12000rpm and 800 µL, supernatant was taken in new 2mL tube with Chloroform:Phenol:Isomyl alcohol (24:24:1) and again centrifuged for 10 mins at 14000 rpm. In next step, 700 µL supernatant taken from the tube and add 700 µL of Chloroform:Isomyl alcohol (24:1) and again centrifuged for 10 mins at 14000rpm. This step was repeated three times. The 400 µL transparent supernatant was collected in tube with isopropanol and incubated for 1.5 hr at -20 °C. After incubation DNA pellet was precipitated at bottom by centrifugation and washed with 70 % ethanol. The washed DNA was suspended in 50 µL double distilled water and quantified with ThermoFisher Quawell Q3000 UV spectrophotometer.

Amplification of fungus DNA was performed in PCR by using ITS primer [58]. For the performance of PCR reaction a volume of 50 µl contained (5 µl 10X reaction buffer; 2.5 mM MgCl<sub>2</sub>; 200 µM each of dNTP, 2.5 units of Taq DNA polymerase (CinnaGen, Tehran, Iran), 30 ng template DNA and 50 pmol of primer. The first denaturation step in a thermocycler was for 5min at 94 °C followed by 35 cycles at 94 °C for 30 sec, annealing was done at 56 °C for 1 min, and extension at 72 °C for 2 min and a final extension at 72 °C for 8 min. Amplified PCR products were electrophoresed on an agarose gel (1.5% w/v) in 1X TAE buffer at 100 V for 50 mins and stained with ethidium bromide [2] [3,4]. The ITS primer successfully amplified the DNA fragments. The Nucleotide was a blast on NCBI and confirmed its spp.

1. Aoki, T.; O'Donnell, K.; Geiser, D.M. Systematics of key phytopathogenic *Fusarium* species: current status and future challenges. *Journal of General Plant Pathology* **2014**, *80*, 189-201.
2. Ramdial, H.; Latchoo, R.; Hosein, F.; Rampersad, S. Phylogeny and haplotype analysis of fungi within the *Fusarium incarnatum-equiseti* species complex. *Phytopathology* **2016**, *107*, 109-120.
3. Zarrin, M.; Ganj, F.; Faramarzi, S. Development of a polymerase chain reaction-restriction fragment length polymorphism method for identification of the *Fusarium* genus using the transcription elongation factor-1 $\alpha$  gene. *Biomedical reports* **2016**, *5*, 705-708.
4. Rasheed, U.; Wu, H.; Wei, J.; Ou, X.; Qin, P.; Yao, X.; Chen, H.; Chen, A.J.; Liu, B. A polyphasic study of *Aspergillus* section *Flavi* isolated from corn in Guangxi, China-a hot spot of aflatoxin contamination. *International journal of food microbiology* **2019**, *310*, 108307.
5. Bridge, J.; Page, S. Estimation of root-knot nematode infestation levels on roots using a rating chart. *International Journal of Pest Management* **1980**, *26*, 296-298.

6. DEVRAN, Z.; ELEKÇİOĞLU, İ.H. The Screening of F<sub>2</sub> Plants for the Root-Knot Nematode Resistance Gene, *Mi* by PCR in Tomato. *Turkish Journal of Agriculture and Forestry* **2004**, *28*, 253-257.

### Screening of Tomato cultivars

#### Tomato Genotypes

Twelve tomato F<sub>1</sub> commercial lines which are highly productive taken from CAAS China Vegetable seed Technology Co., Ltd. Beijing used in this experiment. Moreover, these lines are screened against *Fo* and *Mi*. Among them we choose one susceptible and one resistant advanced line for further analysis. The tomato seeds were surface sterilized with 5 percent NaOCl solution for ten seconds, after that washed twice with distilled sterilized water than dried for sowing in Nursery preparation.

**Table S1. Tomato cultivars used for screening against *Fusarium oxysporum* and *Meloidogyne incognita***

| S/N | Tomato Variety     | Source of seeds                                     | Origin         | General Characteristics                                                           |
|-----|--------------------|-----------------------------------------------------|----------------|-----------------------------------------------------------------------------------|
| 1.  | Zhongza 201        | China Vegetable Seed Technology Co., Ltd. (Beijing) | China          | Red round fruit, 95% germination rate, heat resistant                             |
| 2.  | Zhongza 109        | China Vegetable Seed Technology Co., Ltd. (Beijing) | China          | Round fruit, high yield, 95%germentation rate                                     |
| 3.  | Zhongza 09         | China Vegetable Seed Technology Co., Ltd. (Beijing) | China          | Red round fruit, Heat resistant, Fusarium wilt resistance,                        |
| 4.  | Ji shi             | China Vegetable Seed Technology Co., Ltd. (Beijing) | Israel         | Hard fruit, Disease resistance, high quality & yield                              |
| 5.  | Gailing maofen 802 | Xian jiaxin seed industry Co.,Ltd                   | Xian China     | Wool type pink fruit, hard skin, strong resistance to wilting ToMV CMV & stress   |
| 6.  | Zhongyan           | Xian jiaxin seed industry Co.,Ltd                   | Beijing China  | Pink color short, oblong cherry tomatoes, TY, Root knot nematode resistance       |
| 7.  | Touch healthy      | Beijing Zhongyanyinong Seedling Co., Ltd            | Shang ai China | Highly disease and heat resistant with 85% germination rate super fruit quality   |
| 8.  | Red fruit 808      | Detian Co., Ltd                                     | China          | Top ranking quality and production particularly in south china, Fo wilt resistant |
| 9.  | Naite-3 F1         | Beijing Zhongyanyinong Seedling Co., Ltd            | China          | Heat resistance and pink color fruit, heat resistant                              |
| 10. | Cherry tomatoes    | Beijing Zhongyanyinong Seedling Co., Ltd            | China          | TYLCV ToMv and wilt and heat resistance                                           |
| 11. | Maofeng 202        | Baofeng Quality Seed Co., Ltd                       | China          | Good quality seed, Heat and wilt resistant                                        |
| 12. | Xin Bite 2 F1      | Baofeng Quality Seed Co., Ltd                       | China          | Good germination rate, large fruit size                                           |

Tomato seeds of each variety was surface sterilized with (1.0% NaOCl for 1 min) and sown in pot containing 1kg autoclaved peat moss. After 30 days of seedlings germination each variety was inoculated with 1500 J2

of *Mi* by making three holes around the roots at the same distance except control. Same varieties were also screened against *Fo* by inoculation spore suspension  $1 \times 10^5$  CFU mL<sup>-1</sup> in soil around the roots except control. The experiment was repeated 4 times and each treatment have 20 replicates. Data was recorded after 35 days of *Mi* inoculation.

For screening against *Mi* galls on each root system were scored on a scale of 0–10 (no damage to severe damage), using the severity rating chart by Bridge and Page [5]. The mean gall scores (GSs), egg count per gram of root, and reproductive factors (Rfs) obtained were used as the basis to evaluate the susceptible/resistant status of the rootstocks. Rootstocks were classified as resistant when their root GS < 2 and Rf < 1, tolerant when GS < 2 and Rf ≥ 1, or susceptible when GS ≥ 2 and Rf > 1 [6]. A screening test was also performed to assess susceptible or resistant varieties of tomato against *Fo*. Disease rating scale was made on the basis of disease incidence and disease severity. To calculate the Fusarium wilt disease index we adopted a grade scale, ranging from 0 to 4 where: HR= plants with no symptoms, R = 1 to 25 % leaves shows symptoms of wilting or yellowing, MR = 25 to 50 % leaves with intense wilting or yellowing, MS = 50 to 75 % severely wilted plants, associated with leaf yellowing and necrosis, S = 75 to 100 % leaves shows severe wilting and necrosis, HS = complete plant death. Disease incidence was observed as the symptoms appeared on the plant, and calculate by this formulae:

Disease Incidence (%)= Number of plants showing disease symptoms/ Total number of plants × 100

## Results

**Table S2. Screening of tomato cultivars against *Fusarium oxysporum* and *Meloidogyne incognita***

| S/N | Tomato Variety     | <i>Fusarium oxysporum</i> | <i>Meloidogyne incognita</i> |
|-----|--------------------|---------------------------|------------------------------|
| 1.  | Zhongza 201        | Highly susceptible        | Susceptible                  |
| 2.  | Zhongza 109        | Highly susceptible        | Susceptible                  |
| 3.  | Zhongza 09         | Resistant                 | Susceptible                  |
| 4.  | Ji shi             | Moderately susceptible    | Susceptible                  |
| 5.  | Gailing maofen 802 | Moderately resistant      | Susceptible                  |
| 6.  | Zhongyan           | Susceptible               | Susceptible                  |
| 7.  | Touch healthy      | Highly susceptible        | Susceptible                  |
| 8.  | Red fruit 808      | Moderately susceptible    | Susceptible                  |
| 9.  | Naite-3 F1         | Moderately susceptible    | Susceptible                  |
| 10. | Cherry tomatoes    | Resistant                 | Resistant                    |
| 11. | Maofeng 202        | Susceptible               | Susceptible                  |
| 12. | Xin Bite 2 F1      | Highly susceptible        | Susceptible                  |

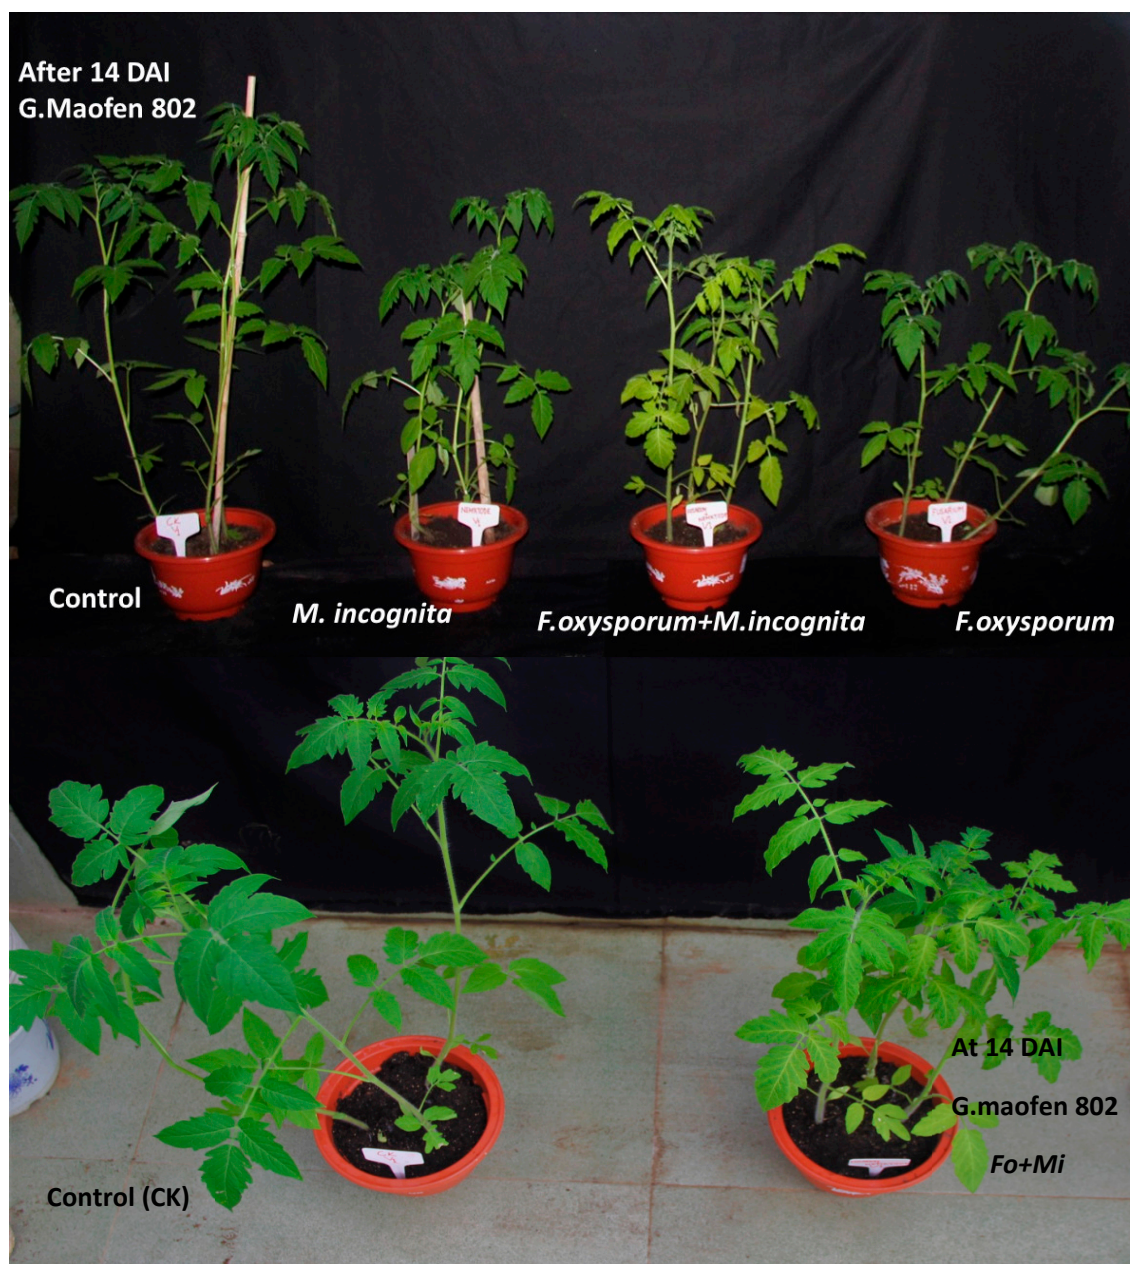

Figure S1: Effect of *Fusarium oxysporum* and *Meloidogyne incognita* on foliar part of G.maofen 802 at 14 DAI.

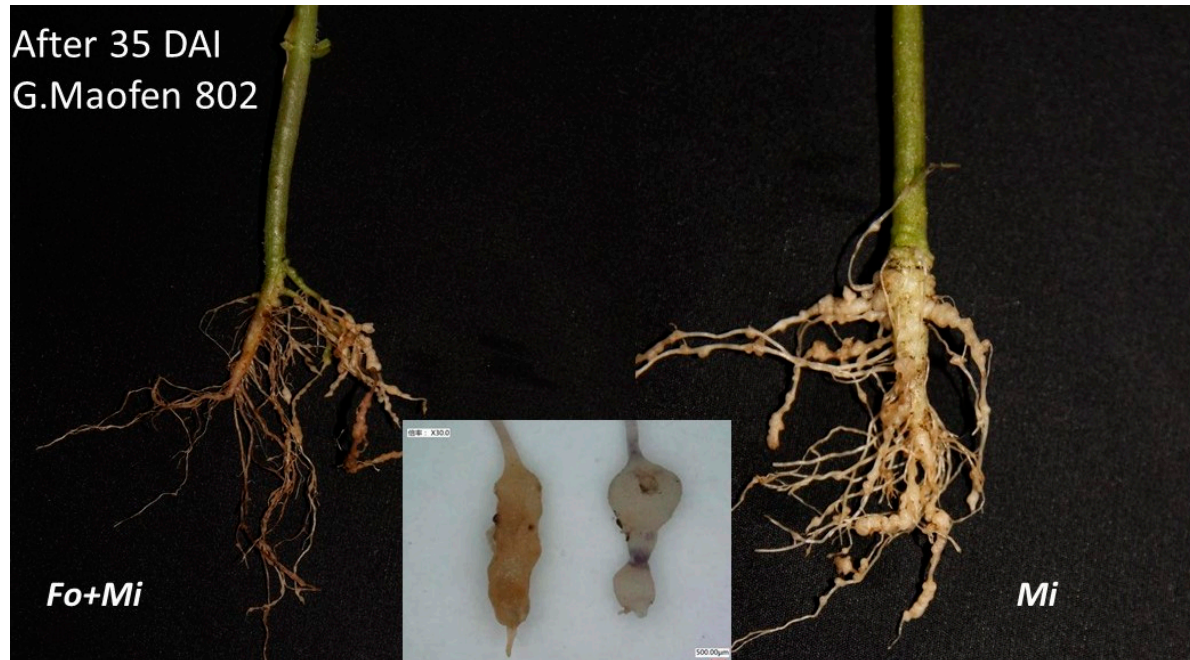

Figure S2: Effect of *Fusarium oxysporum* and *Meloidogyne incognita* single and combine application on roots of *G. maofen 802* after 35 DAI.
